# Supplementary material for: Self-polarized piezoelectric thin films: preparation, formation mechanism and application
Source: Royal Society of Chemistry journal article supplement (doi:10.1039/c5tc01869b), 2015-01-01
Supplement: c5tc01869b2.pdf [file c5tc01869b2.pdf]

## **Electronic supplementary information (ESI)**

### **Self-polarized piezoelectric thin films: preparation, formation mechanism and applications**

Baozhang Li, Chengyi Xu, Feifei Zhang, Jianming Zheng and Chunye Xu\*

CAS Key Laboratory of Soft Matter Chemistry, Department of Polymer Science and  
Engineering, Hefei National Laboratory for Physical Sciences at the Microscale, University of  
Science and Technology of China, Hefei 230026, China

\*Corresponding author: Tel/Fax: +86-551-6360-3459; *E-mail address*: [chunye@ustc.edu.cn](mailto:chunye@ustc.edu.cn)

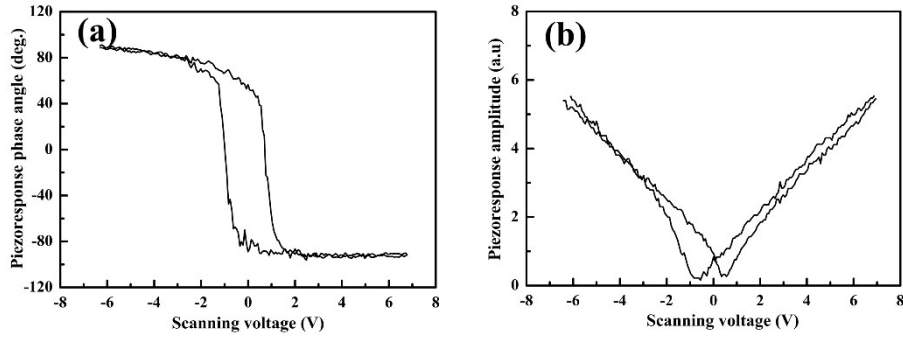

**Fig. S1** Piezoresponse phase loop (a) and piezoresponse amplitude loop (b) of film with thickness of ~150 nm.

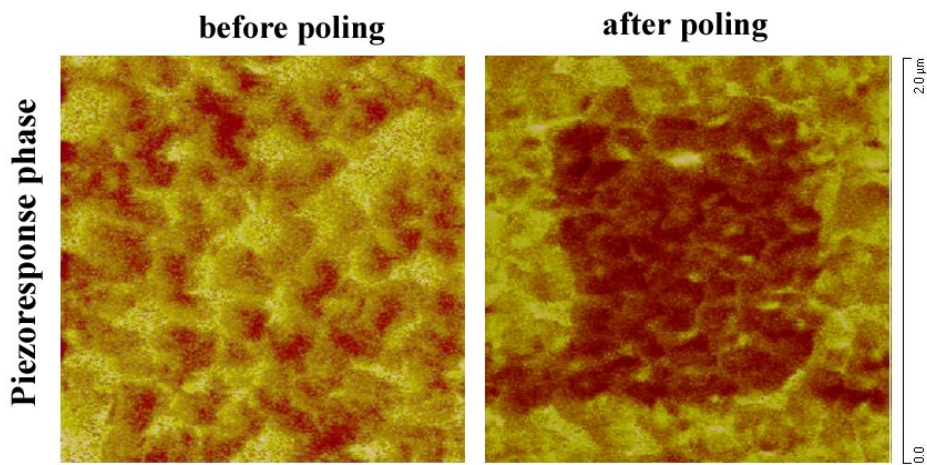

**Fig. S2** Out-of-plane piezoresponse phase images of film with thickness of ~150 nm.

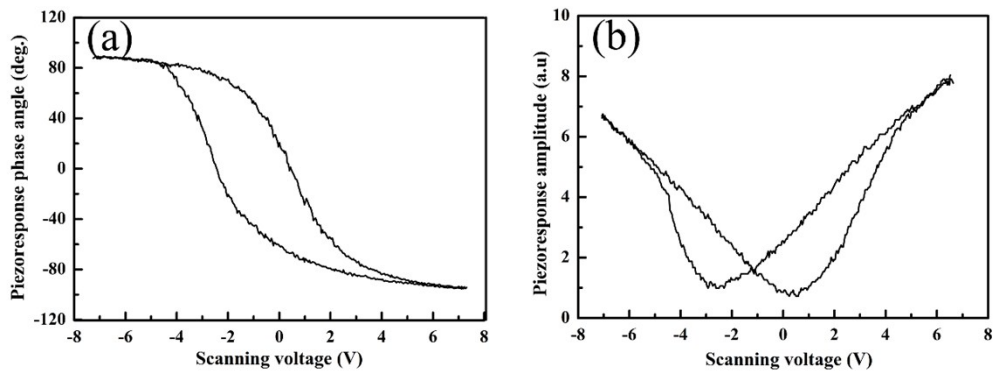

**Fig. S3** Piezoresponse phase loop (a) and piezoresponse amplitude loop (b) of film with thickness of ~230 nm.

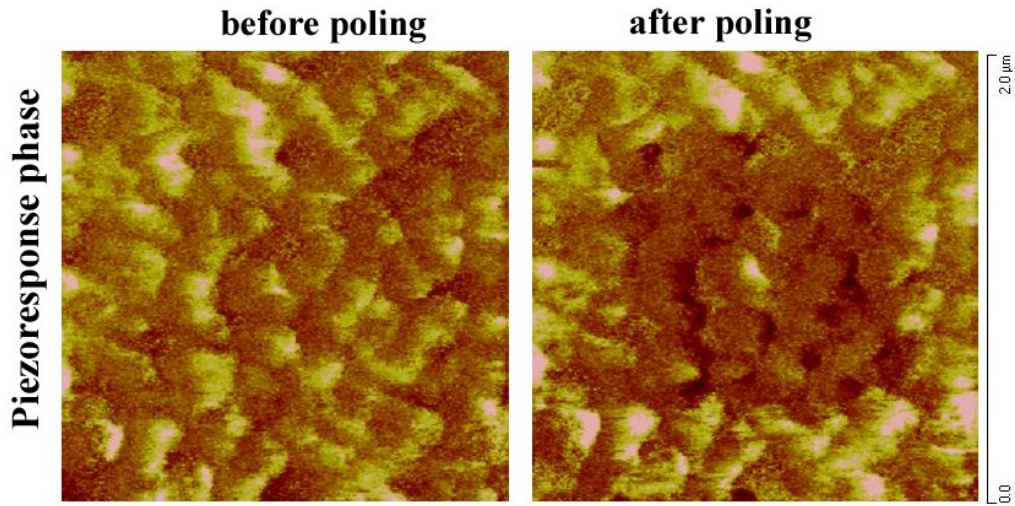

**Fig. S4** Out-of-plane piezoresponse phase images of film with thickness of  $\sim 230$  nm.

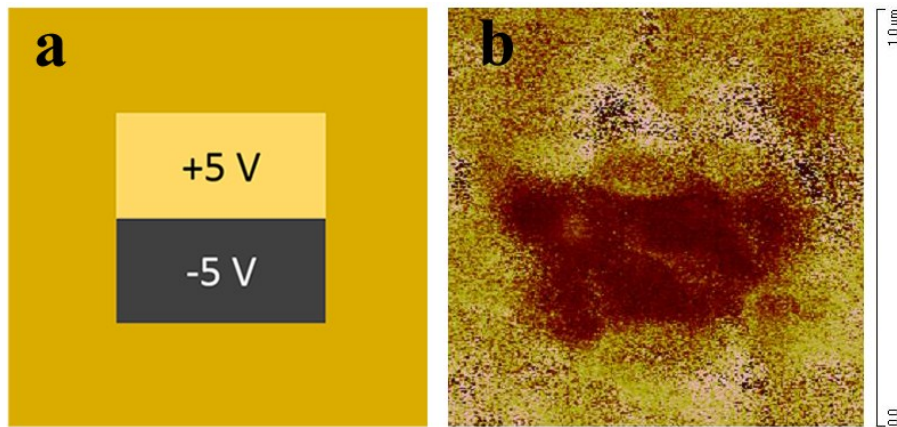

**Fig. S5** Out-of-plane piezoresponse phase image of film with thickness of  $\sim 150$  nm after by performing cantilever based electrical lithography to write electrical domain on the film. Schematic for performing electrical lithography (a); out-of-plane piezoresponse phase image (b).
